# Supplementary material for: Both Neisseria gonorrhoeae and Neisseria sicca Induce Cytokine Secretion by Infected Human Cells, but Only Neisseria gonorrhoeae Upregulates the Expression of Long Non-Coding RNAs
Source: MDPI journal article supplement (doi:10.3390/pathogens11040394), 2022-03-24
Supplement: s1 [file s1]

**Supplementary Table S1.** Primers used for RT-qPCR.

| <b>Gene</b>   | <b>Primer sequence (5' → 3')/catalog number/assay ID</b>   |
|---------------|------------------------------------------------------------|
| CCL20         | 10025636*<br>qHsaCID0011773**                              |
| IL-6          | 10025636*<br>qHsaCID0020314**                              |
| CXCL8         | 10025636*<br>qHsaCED0023767**                              |
| TNF- $\alpha$ | 10025636*<br>qHsaCED0037461**                              |
| M-CSF         | 10025636*<br>qHsaCED0047665**                              |
| GM-CSF        | 10025636*<br>qHsaCED0002766**                              |
| JunB          | 10025636*<br>qHsaCED0018781**                              |
| FosB          | 10025636*<br>qHsaCED0023033**                              |
| NFKBIA        | 10025636*<br>qHsaCED0002729**                              |
| NFKB1         | for: AGGGCCACTGAGCACTATTT<br>rev: AATAGCAGAGGCTCCAGGTG     |
| MALAT1        | for: AAGACCTCGACACCATCGTTAC<br>rev: CTAAGGTCAAGAGAAGTGTCAG |
| ERIC          | for: GTCTGCATATGGGTGCAAGG<br>rev: TTCTCCTGCCCTTCTTCAGG     |
| RP11-510N19.5 | 12004175*<br>qhSaLED0105915**                              |
| B2M           | 10025636*<br>qHsaCID0015347**                              |
| HPRT          | 4326321E***<br>Hs9999909m1****                             |

\* catalogue number (Bio-Rad Laboratories)

\*\* assay ID (Bio-Rad Laboratories)

\*\*\* catalogue number (Thermo Fisher Scientific)

\*\*\*\* assay ID (Thermo Fisher Scientific)
